# Supplementary material for: Changes in Diversification Patterns and Signatures of Selection during the Evolution of Murinae-Associated Hantaviruses
Source: PubMed Central journal article supplement (PMC3970142; doi:10.3390/v6031112), 2014-03-10
Supplement: viruses-06-01112-s001.pdf [file viruses-06-01112-s001.pdf]

# Supplementary Materials for Changes in Diversification Patterns and Signatures of Selection during the Evolution of Murinae-Associated Hantaviruses

**Table S1.** Hantavirus strains used for analysis in this study.

| Species   | Strain                       | Localisation       | Ref Seg S | Ref seg M | Code |
|-----------|------------------------------|--------------------|-----------|-----------|------|
| Amur      | ApJLCB2011-99                | China-Jilin        | JX473004  | JX473003  | 1    |
| Amur      | B78                          | China-Shandong     | AB127997  | AB127994  | 2    |
| Amur      | H5                           | China-Heilongjiang | AB127996  | AB127993  | 3    |
| Amur      | H8205                        | China-Heilongjiang | KC136244  | KC136243  | 4    |
| Amur      | JilinAp06                    | China-Jilin        | EF121324  | DQ914791  | 5    |
| Amur      | JLCB2011                     | China-Jilin        | JX119010  | JX119009  | 6    |
| Amur      | Khekhtsir/AP209/2005         | Russia-Khabarovsk  | AB620028  | AB620029  | 7    |
| Amur      | NA33                         | China-Heilongjiang | JQ061291  |           | 8    |
| Amur      | Solovey/AP63/1999            | Rusia-Primorye     | AB071184  |           | 9    |
| Dabieshan | Wencheng-Nc-427              | China-Zhejiang     | JF796017  | JF796031  | 10   |
| Dabieshan | Wencheng-Nc-469              | China-Zhejiang     | JF796018  | JF796032  | 11   |
| Dabieshan | Wencheng-Nc-470              | China-Zhejiang     | JF796019  | JF796033  | 12   |
| Dabieshan | Yongjia-Nc-15                | China-Zhejiang     | JF796020  | JF796034  | 13   |
| Dabieshan | Yongjia-Nc-38                | China-Zhejiang     | JF796021  | JF796035  | 14   |
| Dabieshan | Yongjia-Nc-58                | China-Zhejiang     | JF796022  | JF796036  | 15   |
| Dabieshan | Yongjia-Nc-95                | China-Zhejiang     | JF796023  | JF796037  | 16   |
| DOBV      | 3970/87                      | Slovenia           | L41916    | L33685    | 17   |
| DOBV      | Aa1854                       | Russia - Lipetsk   | EU188452  | EU188453  | 18   |
| DOBV      | Ap/Sochi/43                  | Russia - Sochi     | JF920151  |           | 19   |
| DOBV      | Ap/Sochi/79                  | Russia - Sochi     | JF920152  |           | 20   |
| DOBV      | Ap/Sochi/hu                  | Russia - Sochi     | JF920150  | JF920149  | 21   |
| DOBV      | AP1584                       | Russia - Sochi     | EU188449  | EU188450  | 22   |
| DOBV      | DOB/Saaremaa/160V            | Estonia            | AJ009773  | AJ009774  | 23   |
| DOBV      | DOBV/Ano-Poroia/13Af/99      | Greece             | AJ410619  |           | 24   |
| DOBV      | DOBV/Ano-Poroia/Af19/1999    | Greece             | NC005233  | AJ410616  | 25   |
| DOBV      | East Slovakia-856-Aa         | Slovakia           | AJ269549  |           | 26   |
| DOBV      | East Slovakia-862-Aa         | Slovakia           | AJ269550  |           | 27   |
| DOBV      | East Slovakia/400Af/98       | Slovakia           | AY168576  | AY168577  | 28   |
| DOBV      | Esl/29Aa/01                  | Slovakia           | AY533118  |           | 29   |
| DOBV      | Esl/34Aa/01                  | Slovakia           | AY961618  |           | 30   |
| DOBV      | Esl/81Aa/01                  | Slovakia           | AY533120  |           | 31   |
| DOBV      | GER/05/239/Aa                | Germany            | GQ205405  |           | 32   |
| DOBV      | GER/05/477/Af                | Germany            | GQ205406  | GQ205411  | 33   |
| DOBV      | GER/07/1064/Aa               | Germany            | GQ205404  |           | 34   |
| DOBV      | GER/07/293/Aa                | Germany            | GQ205401  | GQ205409  | 35   |
| DOBV      | GER/07/607/Af                | Germany            | GQ205402  | GQ205410  | 36   |
| DOBV      | GER/08/118/Aa                | Germany            | GQ205407  | GQ205412  | 37   |
| DOBV      | GER/08/131/Af                | Germany            | GQ205408  | GQ205413  | 38   |
| DOBV      | GRW/Aa                       | Germany            | JQ026204  | JQ026205  | 39   |
| DOBV      | Kurkino/44Aa/98              | Russia - Kurkino   | AJ131672  |           | 40   |
| DOBV      | Kurkino/53Aa/98              | Russia - Kurkino   | AJ131673  |           | 41   |
| DOBV      | Saar/90Aa/97                 | Estonia            | AJ009775  |           | 42   |
| DOBV      | Saaremaa/Lolland/Aa1403/2000 | Denmark            | AJ616854  |           | 43   |

Table S1. Cont.

| Species    | Strain     | Localisation       | Ref Seg S | Ref seg M | Code |
|------------|------------|--------------------|-----------|-----------|------|
| DOBV       | SK/Aa      | Slovakia           | AY961615  | AY961616  | 44   |
| DOBV       | Slo/Af-BER | Slovenia           | GU904029  | GU904035  | 45   |
| Hantavirus | AH09       | China-Anhui        | AF285264  | AF285265  | 46   |
| Hantavirus | CGRn8316   | China-Guizhou      | EF990903  | EF990917  | 47   |
| Hantavirus | CGRn9415   | China-Guizhou      | EF990902  | EF990916  | 48   |
| hantavirus | KY         | China-Yunnan       | GU140098  | GU140097  | 49   |
| Hantavirus | Liu        | China-Shandong     | AF288649  | AF288648  | 50   |
| Hantavirus | S85-46     | China-Shichuan     | AF288659  | AF288658  | 51   |
| HTNV       | 76-118     | SouthKorea         | M14626    | M14627    | 52   |
| HTNV       | 84FLi      | China-Shaanxi      | AY017064  | AF345636  | 53   |
| HTNV       | A16        | China-Shaanxi      | AF288646  | AF288645  | 54   |
| HTNV       | A9         | China-Jiangsu      | AF329390  | AF035831  | 55   |
| HTNV       | AA1028     | Russia-Khabarovsk  | AF427318  |           | 56   |
| HTNV       | AA2499     | Russia-Khabarovsk  | AF427320  |           | 57   |
| HTNV       | AA57       | Russia-Khabarovsk  | AB620031  | AB620032  | 58   |
| HTNV       | AP1371     | Russia-Khabarovsk  | AF427324  |           | 59   |
| HTNV       | AP708      | Russia-Khabarovsk  | AF427322  |           | 60   |
| HTNV       | Bao14      | China-Heilongjiang | AB127998  | AB127995  | 61   |
| HTNV       | CA09082007 | China-Shaanxi      | HQ834499  |           | 62   |
| HTNV       | CA10081109 | China-Shaanxi      | HQ834500  |           | 63   |
| HTNV       | CA10081113 | China-Shaanxi      | HQ834501  |           | 64   |
| HTNV       | CA10081203 | China-Shaanxi      | HQ834502  |           | 65   |
| HTNV       | CA10081206 | China-Shaanxi      | HQ834503  |           | 66   |
| HTNV       | CA10081708 | China-Shaanxi      | HQ834504  |           | 67   |
| HTNV       | CA10081905 | China-Shaanxi      | HQ834505  |           | 68   |
| HTNV       | CFC94-2    | Korea              | X95077    |           | 69   |
| HTNV       | CGAa1011   | China-Guizhou      | EF990913  | EF990927  | 70   |
| HTNV       | CGAa1015   | China-Guizhou      | EF990912  | EF990926  | 71   |
| HTNV       | CGAa2      | China-Guizhou      | EU092219  | EU092223  | 72   |
| HTNV       | CGAa31MP7  | China-Guizhou      | EF990911  | EF990925  | 73   |
| HTNV       | CGAa31P9   | China-Guizhou      | EF990910  | EF990924  | 74   |
| HTNV       | CGAa4MP9   | China-Guizhou      | EF990915  | EF990929  | 75   |
| HTNV       | CGAa4P15   | China-Guizhou      | EF990914  | EF990928  | 76   |
| HTNV       | CGAa75     | China-Guizhou      | EU092220  | EU092224  | 77   |
| HTNV       | CGHu1      | China-Guizhou      | EU092218  | EU092222  | 78   |
| HTNV       | CGHu2      | China-Guizhou      | EU363813  | EU363819  | 79   |
| HTNV       | CGHu3      | China-Guizhou      | EU363809  | EU363818  | 80   |
| HTNV       | CGHu3612   | China-Guizhou      | EF990909  | EF990923  | 81   |
| HTNV       | CGHu3614   | China-Guizhou      | EF990908  | EF990922  | 82   |
| HTNV       | CGRn15     | China-Guizhou      | EU363810  | EU363814  | 83   |
| HTNV       | CGRn2616   | China-Guizhou      | EU363811  | EU363816  | 84   |
| HTNV       | CGRn2618   | China-Guizhou      | EU363808  | EU363817  | 85   |
| HTNV       | CGRn45     | China-Guizhou      | EU092221  | EU092225  | 86   |
| HTNV       | CGRn53     | China-Guizhou      | EF990907  | EF990921  | 87   |
| HTNV       | CGRn5310   | China-Guizhou      | EF990906  | EF990920  | 88   |
| HTNV       | CGRn93MP8  | China-Guizhou      | EF990905  | EF990919  | 89   |

Table S1. Cont.

| Species | Strain            | Localisation      | Ref Seg S | Ref seg M | Code |
|---------|-------------------|-------------------|-----------|-----------|------|
| HTNV    | CGRn93P8          | China-Guizhou     | EF990904  | EF990918  | 90   |
| HTNV    | CGRni1            | China-Guizhou     | EU363812  | EU363815  | 91   |
| HTNV    | Chen4             | China-Shaanxi     | AB027101  |           | 92   |
| HTNV    | CJAp93            | China-Jilin       | EF208929  | EF208930  | 93   |
| HTNV    | CUMC-B11          | SoutKorea         | U37768    | U37729    | 94   |
| HTNV    | E142              | China-Yunan       | AF288644  |           | 95   |
| HTNV    | Galkino/AA57/2002 | Russia-Khabarovsk | AB620031  |           | 96   |
| HTNV    | H10150            | China-Shaanxi     | HQ834506  |           | 97   |
| HTNV    | HubeiHu02         | China-Hubei       | JQ665905  | JQ665881  | 98   |
| HTNV    | HV004             | China-Hubei       | JQ083395  | JQ083394  | 99   |
| HTNV    | LR1               | China             | AF288294  | AF288293  | 100  |
| HTNV    | Maaji-1           | Korea             | AF321094  |           | 101  |
| HTNV    | Maaji-2           | Korea             | AF321095  |           | 102  |
| HTNV    | N8                | China-Jiangxi     | DQ658415  | EF077656  | 103  |
| HTNV    | NC167             | China-Anhui       | AB027523  | AB027115  | 104  |
| HTNV    | Q32               | China-Guizhou     | AB027097  | DQ371905  | 105  |
| HTNV    | RG9               | China-Guangdong   | AF288296  |           | 106  |
| HTNV    | SN7               | China-Shichuan    | AF288657  | AF288656  | 107  |
| HTNV    | TJJ16             | China-Tianjin     | AY839871  | EU074672  | 108  |
| HTNV    | WuhanAaJ10        | China-Hubei       | JQ665906  | JQ665882  | 109  |
| HTNV    | YaluRiver13       | China-Jilin       | HQ611981  |           | 110  |
| HTNV    | YN509             | China-Yunnan      | GU329991  |           | 111  |
| HTNV    | YU61              | China             | AY748308  |           | 112  |
| HTNV    | YU62              | China             | AY748309  |           | 113  |
| HTNV    | Z10               | China-Zhejiang    | AF184987  | AF143675  | 114  |
| HTNV    | Z251              | China-Zhejiang    | EF595840  | GQ120966  | 115  |
| HTNV    | ZLS-12            | China-Zhejiang    | FJ753398  | FJ753399  | 116  |
| HTNV    | ZLS6-11           | China-Zhejiang    | FJ753396  | FJ753397  | 117  |
| Jurong  | TJK/06            | Singapore         | GQ274941  | GQ274939  | 118  |
| SANGV   | SA14              | Guinea            | JQ082300  | JQ082301  | 119  |
| SANGV   | SA22              | Guinea            | JQ082303  |           | 120  |
| SEOV    | 80-39             | Sout Korea        | S47716    | NC005237  | 121  |
| SEOV    | 93HBX12           | China-Hebei       | EF192308  |           | 122  |
| SEOV    | BjHD01            | China-Beijing     | AY627049  | DQ133505  | 123  |
| SEOV    | Cherwell          | UK                | KC626089  |           | 124  |
| SEOV    | CixiRf23          | China-Zhejiang    | FJ803201  |           | 125  |
| SEOV    | CixiRf56          | China-Zhejiang    | FJ803202  |           | 126  |
| SEOV    | CixiRn169         | China-Zhejiang    | FJ803207  |           | 127  |
| SEOV    | CixiRn21          | China-Zhejiang    | FJ803205  |           | 128  |
| SEOV    | CixiRn76          | China-Zhejiang    | FJ803206  |           | 129  |
| SEOV    | CSG5              | Vietnam           | AB618112  |           | 130  |
| SEOV    | CUI               | China-Beijing     | GQ279395  |           | 131  |
| SEOV    | DPRK08            | North Korea       | JX853575  | JX853576  | 132  |
| SEOV    | FeixianRn1        | China-Shandong    | GU592942  |           | 133  |
| SEOV    | GanyuMm187        | China-Jiangsu     | GU592934  |           | 134  |
| SEOV    | GanyuRn137        | China-Jiangsu     | GU592933  |           | 135  |

Table S1. Cont.

| Species | Strain                        | Localisation       | Ref Seg S | Ref seg M | Code |
|---------|-------------------------------|--------------------|-----------|-----------|------|
| SEOV    | GanyuRn66                     | China-Jiangsu      | GU592932  |           | 136  |
| SEOV    | GaomiRn47                     | China-Shandong     | GU592938  |           | 137  |
| SEOV    | GaomiRn9                      | China-Shandong     | GU592941  |           | 138  |
| SEOV    | Gou3                          | China-Zhejiang     | AB027522  | AB027521  | 139  |
| SEOV    | GuangzhouRn36                 | China-Guangdong    | GU592948  |           | 140  |
| SEOV    | Hb8610                        | China-Shanxi       | AF288643  |           | 141  |
| SEOV    | HebeiMm7                      | China-Hebei        | GU592935  |           | 142  |
| SEOV    | HuBJ15                        | China-Beijing      | GQ279390  |           | 143  |
| SEOV    | HuBJ16                        | China-Beijing      | GQ279380  |           | 144  |
| SEOV    | HuBJ19                        | China-Beijing      | GQ279389  |           | 145  |
| SEOV    | HuBJ20                        | China-Beijing      | GQ279394  |           | 146  |
| SEOV    | HuBJ22                        | China-Beijing      | GQ279379  |           | 147  |
| SEOV    | HuBJ3                         | China-Beijing      | GQ279391  |           | 148  |
| SEOV    | HuBJ7                         | China-Beijing      | GQ279381  |           | 149  |
| SEOV    | HuBJ9                         | China-Beijing      | GQ279384  |           | 150  |
| SEOV    | HuludaoRn101                  | China-Liaoning     | GU592952  | GU592931  | 151  |
| SEOV    | Humber                        | UK                 | JX879769  | JX879768  | 152  |
| SEOV    | IR461                         | UK                 | AF329388  | AF458104  | 153  |
| SEOV    | JinanRn1                      | China-Shandong     | GU592937  |           | 154  |
| SEOV    | JiningCt13                    | China-Shandong     | GU592940  |           | 155  |
| SEOV    | JUN5-14                       | China-Shandong     | DQ217791  |           | 156  |
| SEOV    | K24-e7                        | China-Zhejiang     | AF288653  | AF288652  | 157  |
| SEOV    | K24-v2                        | China-Zhejiang     | AF288655  | AF288654  | 158  |
| SEOV    | L99                           | China-Jiangxi      | AF288299  | AF288298  | 159  |
| SEOV    | Longwan581                    | China-Zhejiang     | GU592946  |           | 160  |
| SEOV    | OuhaiRf35                     | China-Zhejiang     | FJ803208  |           | 161  |
| SEOV    | OuhaiRn146                    | China-Zhejiang     | FJ803210  |           | 162  |
| SEOV    | OuhaiRn189                    | China-Zhejiang     | FJ803211  |           | 163  |
| SEOV    | OuhaiRn251                    | China-Zhejiang     | FJ803212  |           | 164  |
| SEOV    | Pf26                          | China-Heilongjiang | AY006465  |           | 165  |
| SEOV    | QingdaoMm15                   | China-Shandong     | GU592939  |           | 166  |
| SEOV    | QixianRn10                    | China-Henan        | GU592949  |           | 167  |
| SEOV    | R22                           | China-Henan        | AF288295  |           | 168  |
| SEOV    | REPLONGES/Hu/FRA/2012/12-0882 | France             | KC902522  |           | 169  |
| SEOV    | Rn-CP7                        | China-Beijing      | GQ279382  |           | 170  |
| SEOV    | Rn-DC8                        | China-Beijing      | GQ279386  |           | 171  |
| SEOV    | Rn-DH27                       | China-Beijing      | GQ279393  |           | 172  |
| SEOV    | Rn-HD11                       | China-Beijing      | GQ279392  |           | 173  |
| SEOV    | Rn-M11                        | China-Beijing      | GQ279383  |           | 174  |
| SEOV    | Rn-SHY17                      | China-Beijing      | GQ279388  |           | 175  |
| SEOV    | RuianRf74                     | China-Zhejiang     | FJ803213  |           | 176  |
| SEOV    | RuianRn180                    | China-Zhejiang     | GU592953  | GU904035  | 177  |
| SEOV    | RuianRn23                     | China-Zhejiang     | FJ803214  |           | 178  |
| SEOV    | RuianRn242                    | China-Zhejiang     | GU592945  | GU592928  | 179  |
| SEOV    | RuianRn33                     | China-Zhejiang     | FJ803215  |           | 180  |
| SEOV    | RuianRn76                     | China-Zhejiang     | FJ803216  |           | 181  |

Table S1. Cont.

| Species  | Strain                        | Localisation       | Ref Seg S | Ref seg M | Code |
|----------|-------------------------------|--------------------|-----------|-----------|------|
| SEOV     | RuianRr57                     | China-Zhejiang     | FJ803217  |           | 182  |
| SEOV     | Sapporo                       | Japan              | M34881    | M34882    | 183  |
| SEOV     | SC106                         | China-Heilongjiang | GU361893  |           | 184  |
| SEOV     | SD201                         | China-Shandong     | GQ279385  |           | 185  |
| SEOV     | SEO/Belgium/Rn895/2005        | Belgium            | JQ898106  |           | 186  |
| SEOV     | ShenyangRn139                 | China-Liaoning     | GU592951  |           | 187  |
| SEOV     | ShenyangRn19                  | China-Liaoning     | GU592950  |           | 188  |
| SEOV     | Singapore/06(RN41)            | Singapore          | GQ274944  | GQ274942  | 189  |
| SEOV     | Singapore/06(RN46)            | Singapore          | GQ274945  | GQ274943  | 190  |
| SEOV     | tchoupitoulas                 | USA                | AF329389  |           | 191  |
| SEOV     | WuhanMm13                     | China-Hubei        | JQ665910  | JQ665886  | 192  |
| SEOV     | WuhanMm24                     | China-Hubei        | JQ665911  | JQ665887  | 193  |
| SEOV     | WuhanRf02                     | China-Hubei        | JQ665912  | JQ665888  | 194  |
| SEOV     | WuhanRf07                     | China-Hubei        | JQ665913  | JQ665889  | 195  |
| SEOV     | WuhanRf08                     | China-Hubei        | JQ665914  | JQ665890  | 196  |
| SEOV     | WuhanRf11                     | China-Hubei        | JQ665915  | JQ665891  | 197  |
| SEOV     | WuhanRf12                     | China-Hubei        | JQ665916  | JQ665892  | 198  |
| SEOV     | WuhanRf18                     | China-Hubei        | JQ665917  | JQ665893  | 199  |
| SEOV     | WuhanRf33                     | China-Hubei        | JQ665918  | JQ665894  | 200  |
| SEOV     | WuhanRf49                     | China-Hubei        | JQ665919  | JQ665895  | 201  |
| SEOV     | WuhanRn10                     | China-Hubei        | JQ665920  | JQ665896  | 202  |
| SEOV     | WuhanRn25                     | China-Hubei        | JQ665921  | JQ665897  | 203  |
| SEOV     | WuhanRn53                     | China-Hubei        | JQ665922  | JQ665898  | 204  |
| SEOV     | WuhanRn57                     | China-Hubei        | JQ665923  | JQ665899  | 205  |
| SEOV     | WuhanRn58                     | China-Hubei        | JQ665924  | JQ665900  | 206  |
| SEOV     | WuhanRn63                     | China-Hubei        | JQ665925  | JQ665901  | 207  |
| SEOV     | WuhanRn67u                    | China-Hubei        | JQ665926  | JQ665902  | 208  |
| SEOV     | WuhanRn75                     | China-Hubei        | JQ665927  | JQ665903  | 209  |
| SEOV     | WuhanRn98                     | China-Hubei        | JQ665928  | JQ665904  | 210  |
| SEOV     | XiaotangshanRn7               | China-Beijing      | GU592944  | GU592927  | 211  |
| SEOV     | YaluRiver12                   | North Korea        | HQ611980  |           | 212  |
| SEOV     | YongjiaRf45                   | China-Zhejiang     | GU592943  | GU592926  | 213  |
| SEOV     | YongjiaRn14                   | China-Zhejiang     | GU592947  | GU592929  | 214  |
| SEOV     | YZG-Changchun                 | China-Jilin        | EF536376  |           | 215  |
| SEOV     | Z37                           | China-Zhejiang     | AY605933  | AF190119  | 216  |
| SEOV     | ZT10                          | China-Zhejiang     | AY766368  | DQ159911  | 217  |
| SEOV     | ZT71                          | China-Zhejiang     | AY750171  | EF117248  | 218  |
| SEOV     | zy27                          | China-Heilongjiang | AF406965  |           | 219  |
| Serang   | Serang/Rt60/2000              | Indonesia          | AM998808  |           | 220  |
| Soochong | SC-1                          | South Korea        | AY675349  | AY675353  | 221  |
| Soochong | SC-2                          | South Korea        | AY675350  | DQ056293  | 222  |
| Soochong | SC-3                          | South Korea        | AY675351  | DQ056294  | 223  |
| Soochong | SC-4                          | South Korea        | AY675352  | DQ056295  | 224  |
| THAIV    | Nakhon Ratchasima/Bi0017/2004 | Thailand           | AM397664  |           | 225  |

**Figure S1.** Geographic distribution of DOBV (in blue), SEOV (in red) and HTNV (in green) variants used in this study. Numbers correspond to the codes assigned to each strain in Table S1. The green and red circles indicate places where documented reassortments between SEOV and HTNV strains occur.

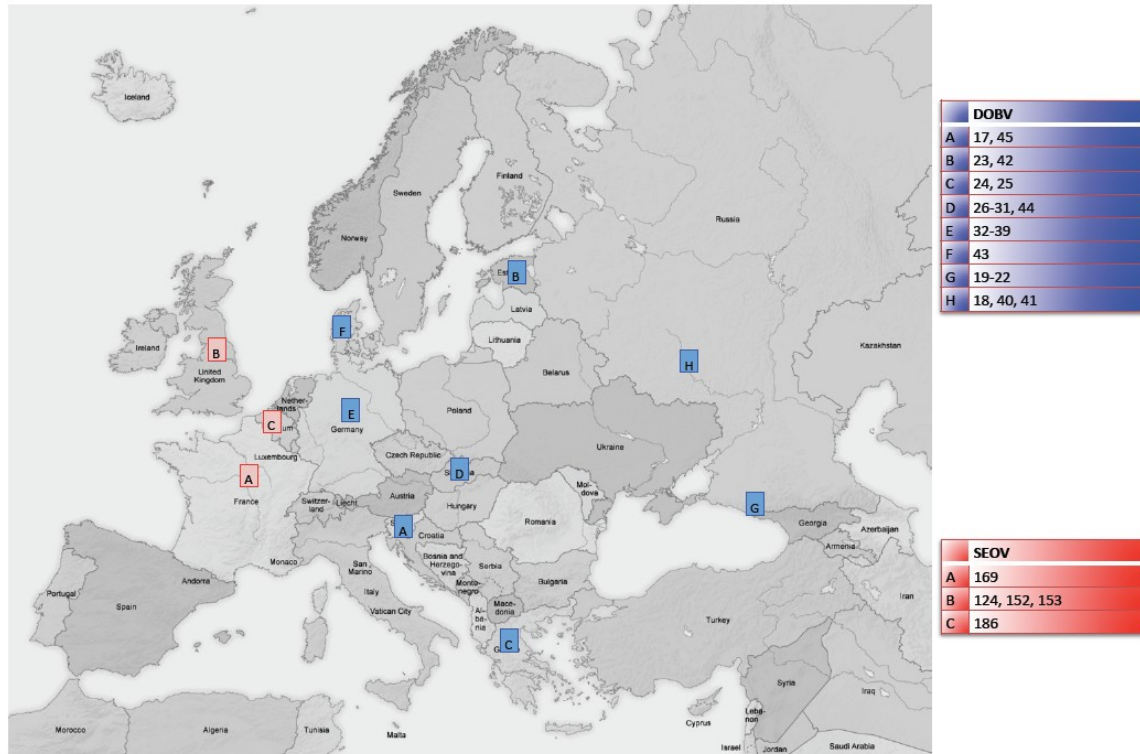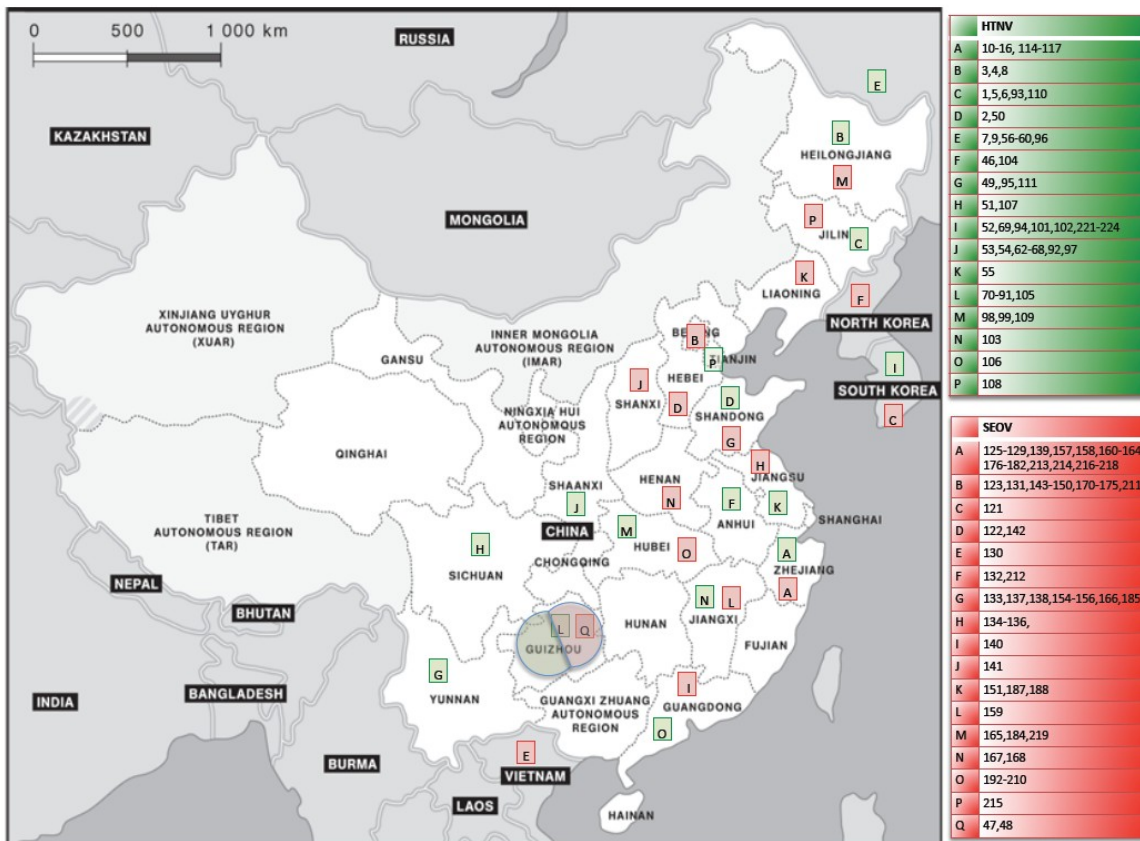

**Figure S2.** BEAST time calibrated (ultrametric) trees based on S (a) and M (b) segments. Root ages were arbitrarily assigned to 1. Nodes before the threshold are considered as species diversification events, whereas branches crossing the threshold define clusters following a coalescent process (in color). Inserts illustrate the Lineage-through-time (LTT) plots. The position of the switches between two evolution patterns (red line) were determined by the method of Pons *et al.*

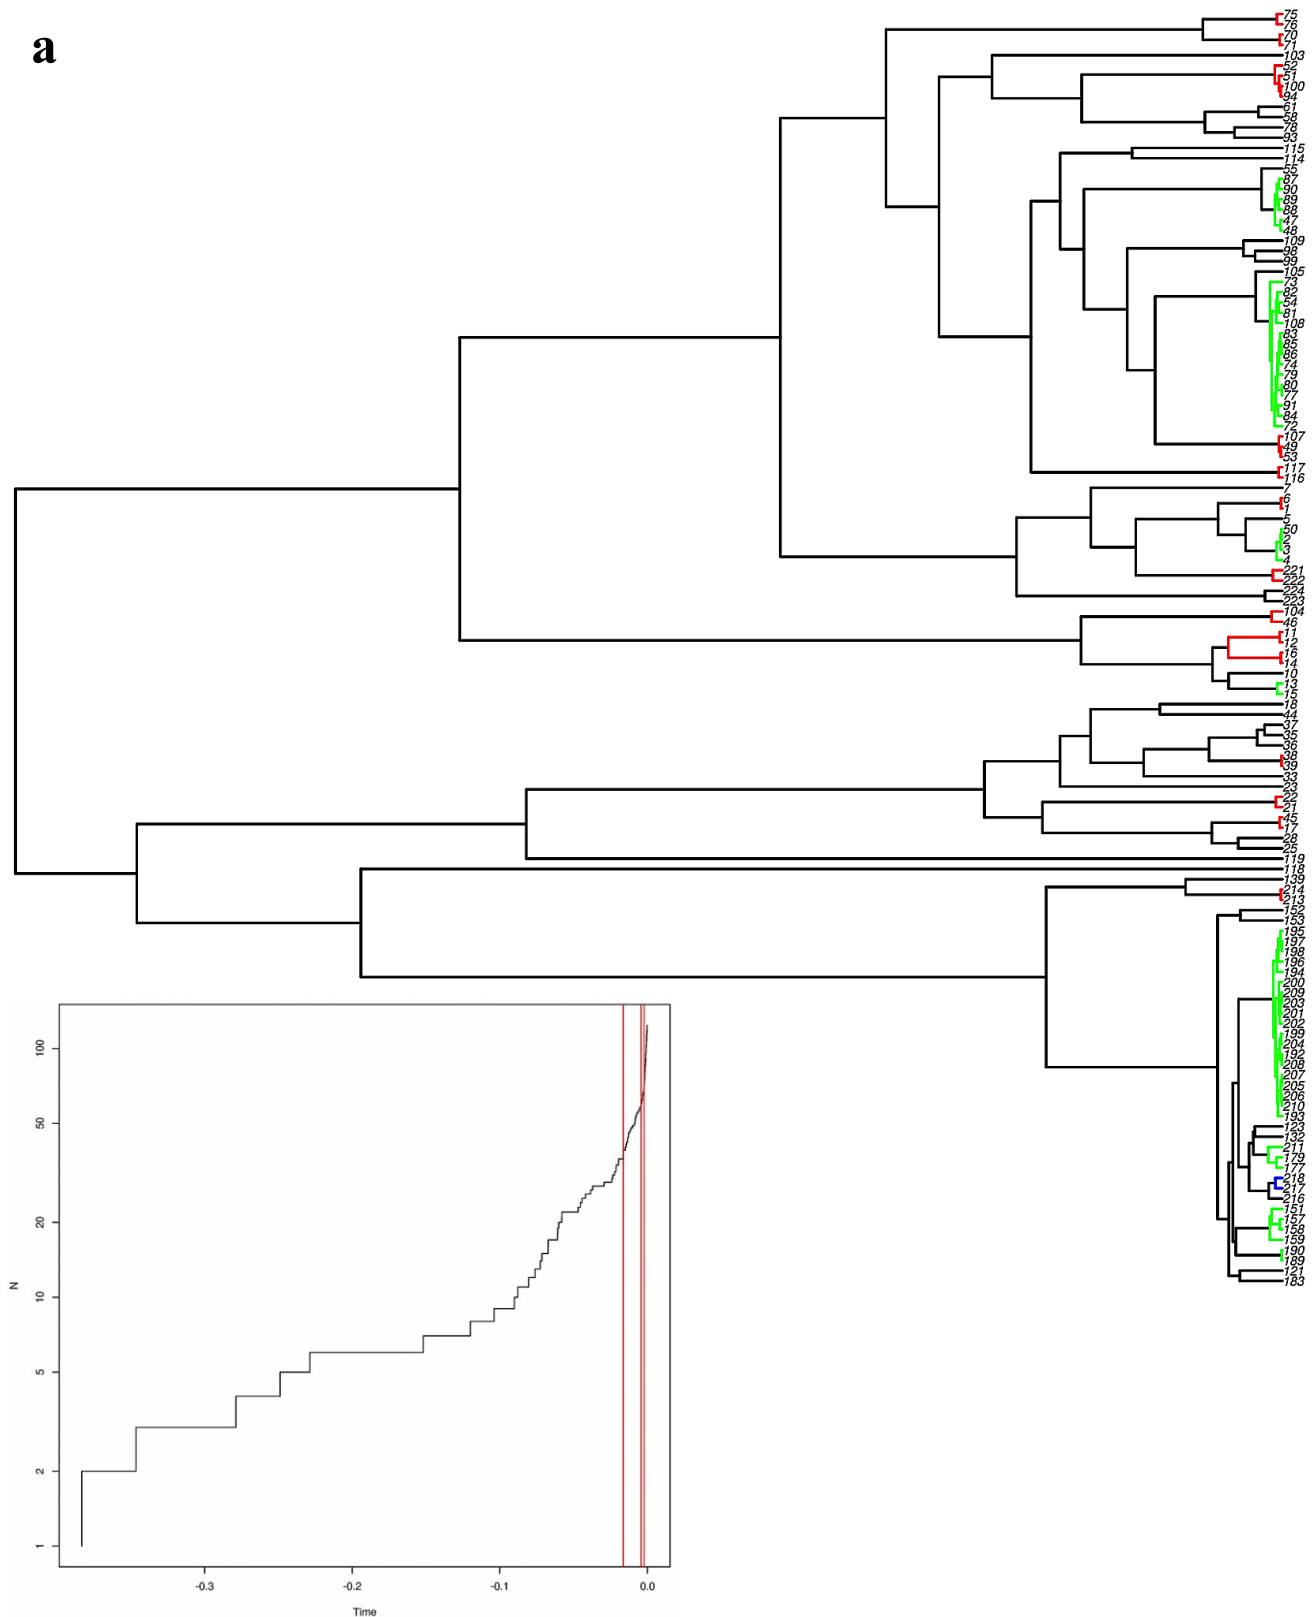

Figure S2. Cont.

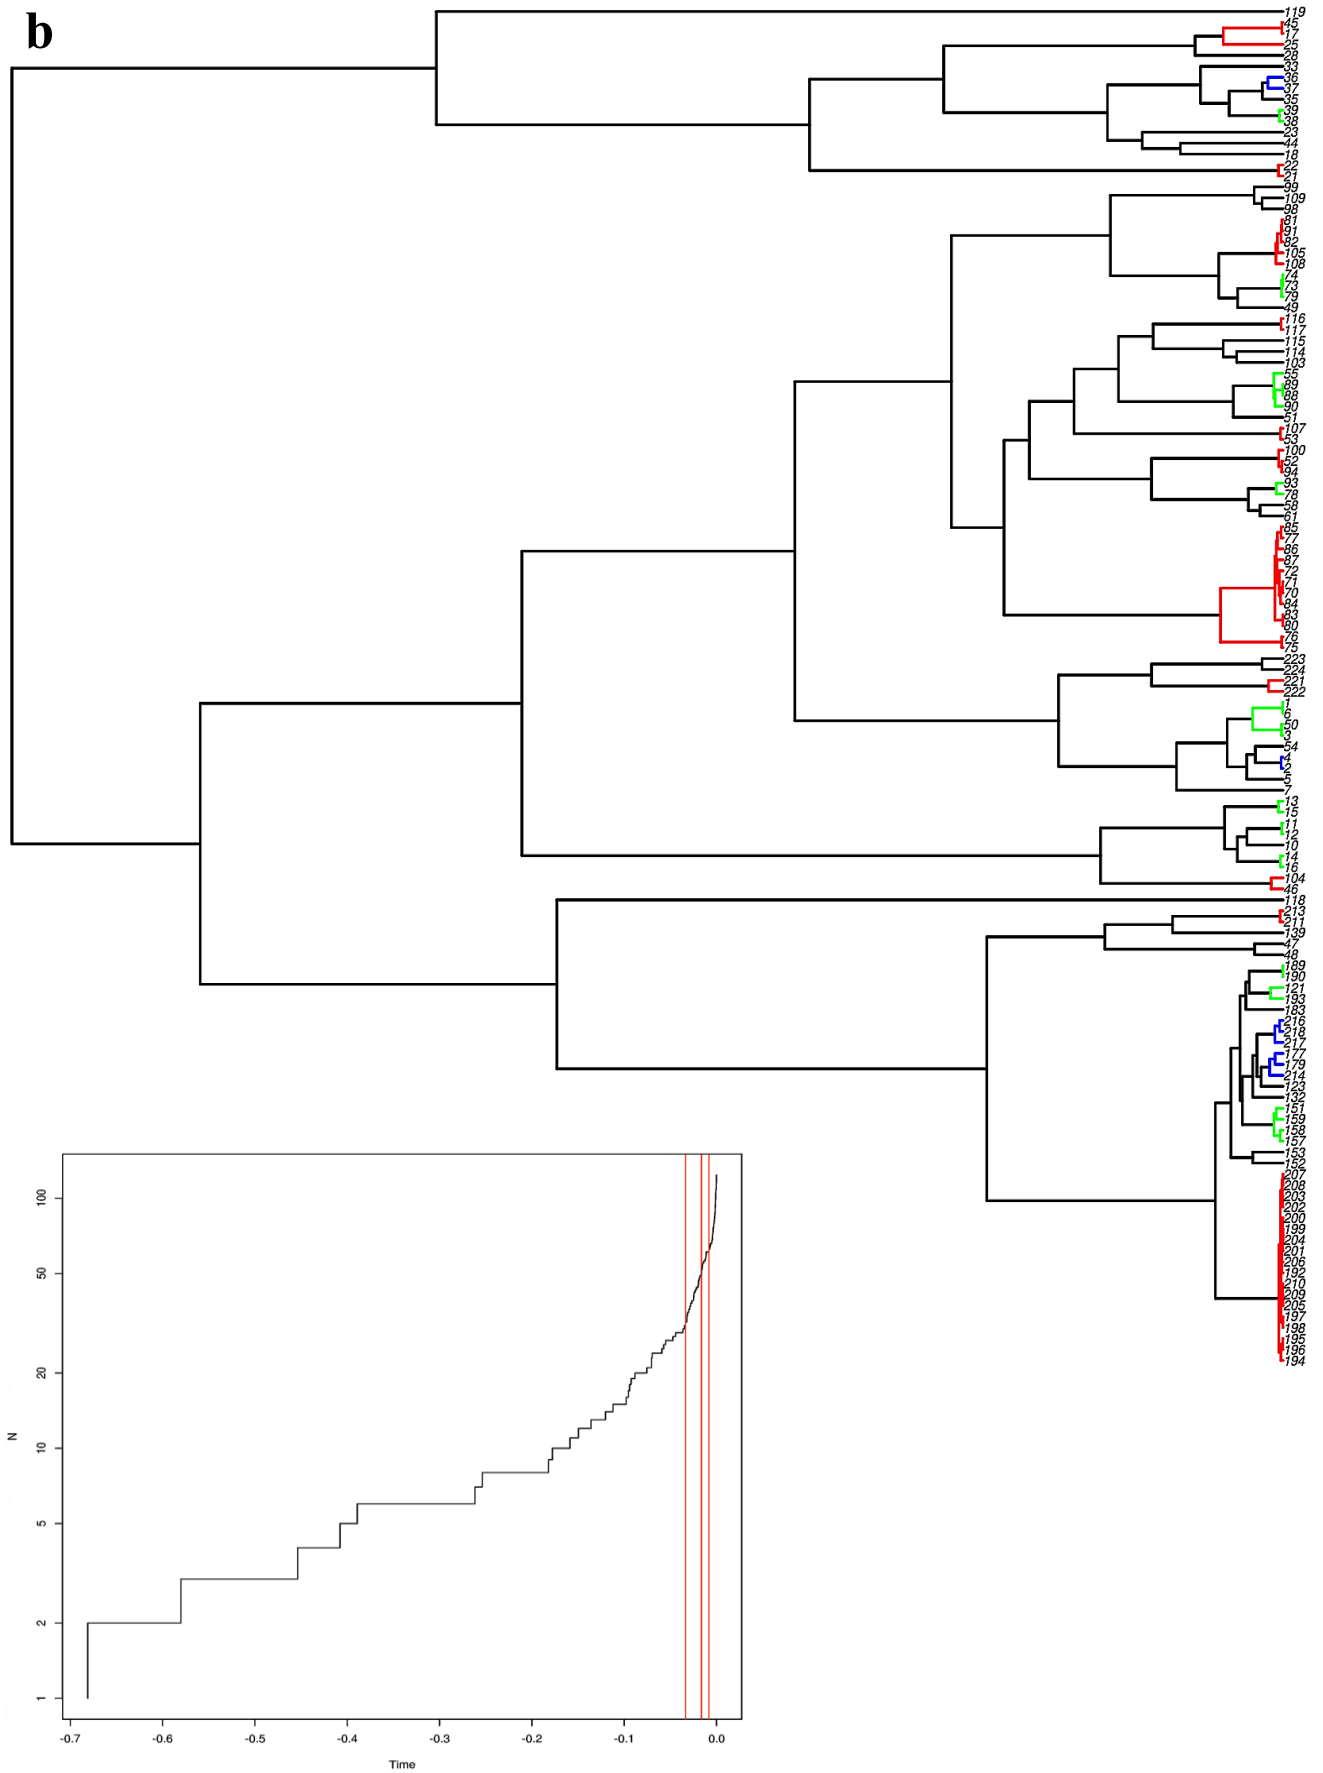



**Table S2.** List of significant phylotypes. Pi, identifier of phylotype root (referring to identifiers on Figure 4), Cov, coverage (*i.e.*, percentage of taxa annotated with Character state that belongs to the phylotype); Sz, size with *p*-values (in parenthesis) given as fractions, where the denominator indicates the number of shuffles.

| Optimization | dataset                   | Pi       | Character state | Cov %       | Sz ( <i>p</i> -value) |
|--------------|---------------------------|----------|-----------------|-------------|-----------------------|
| DELTRAN      | S segment                 | 55       | Guizhou         | 80          | 20 (0/1000)           |
|              |                           | 210      | Hubei           | 86          | 19 (0/1000)           |
|              |                           | 3        | Zhejiang        | 33          | 7 (7/1000)            |
|              |                           | 194      | Zhejiang        | 24          | 7 (47/1000)           |
|              |                           | 146      | Germany         | 100         | 6 (0/1000)            |
|              | M segment                 | 51       | Guizhou         | 92          | 23 (0/1000)           |
|              |                           | 212      | Hubei           | 82          | 18 (0/1000)           |
|              |                           | 179      | Zhejiang        | 38          | 8 (3/1000)            |
|              |                           | 34       | Zhejiang        | 33          | 7 (5/1000)            |
|              |                           | 13       | Germany         | 100         | 6 (0/1000)            |
|              | S segment (large dataset) | 393      | Beijing         | 41          | 7 (0/1000)            |
|              |                           | 423      | Beijing         | 41          | 7 (0/1000)            |
|              |                           | 104      | Guizhou         | 24          | 6 (3/1000)            |
|              |                           | 151      | Guizhou         | 48          | 12 (0/1000)           |
|              |                           | 319      | Hubei           | 86          | 19 (0/1000)           |
|              |                           | 123      | Shaanxi         | 73          | 8 (0/1000)            |
|              |                           | 318      | Zhejiang        | 50          | 18 (0/1000)           |
|              |                           | 6        | Zhejiang        | 19          | 7 (20/1000)           |
|              |                           | 222      | Germany         | 100         | 8 (0/1000)            |
|              |                           | 22       | Korea           | 75          | 9 (0/1000)            |
| 211          | Slovakia                  | 86       | 6 (0/1000)      |             |                       |
| ACCTAN       | S segment                 | 55       | Guizhou         | 80          | 20 (0/1000)           |
|              |                           | 210      | Hubei           | 86          | 19 (0/1000)           |
|              |                           | 3        | Zhejiang        | 33          | 7 (28/1000)           |
|              |                           | 178      | Zhejiang        | 33          | 7 (28/1000)           |
|              |                           | 146      | Germany         | 100         | 6 (0/1000)            |
|              | M segment                 | 51       | Guizhou         | 92          | 23 (0/1000)           |
|              |                           | 174      | Hubei           | 86          | 19 (0/1000)           |
|              |                           | 190      | Zhejiang        | 29          | 6 (42/1000)           |
|              |                           | 34       | Zhejiang        | 33          | 7 (5/1000)            |
|              |                           | 13       | Germany         | 100         | 6 (0/1000)            |
|              | S segment (large dataset) | 393      | Beijing         | 41          | 7 (0/1000)            |
|              |                           | 423      | Beijing         | 41          | 7 (0/1000)            |
|              |                           | 104      | Guizhou         | 24          | 6 (19/1000)           |
|              |                           | 151      | Guizhou         | 48          | 12 (0/1000)           |
|              |                           | 319      | Hubei           | 86          | 19 (0/1000)           |
|              |                           | 123      | Shaanxi         | 73          | 8 (0/1000)            |
|              |                           | 6        | Zhejiang        | 19          | 7 (50/1000)           |
| 252          |                           | Zhejiang | 50              | 18 (0/1000) |                       |
| 222          | Germany                   | 100      | 8 (0/1000)      |             |                       |
| 22           | Korea                     | 75       | 9 (0/1000)      |             |                       |
| 211          | Slovakia                  | 86       | 6 (0/1000)      |             |                       |
